# Supplementary material
Source: publisher figshare collection journal article supplement (https://acs.figshare.com/ndownloader/files/16353521)
Supplement: Supplementary file 1 [file 16353521]

# Insight into the Humidity Dependent Pseudo-n-Type Response of p-CuScO<sub>2</sub> toward Ammonia

*Zanhong Deng,<sup>†,‡</sup> Bin Tong,<sup>†,§</sup> Gang Meng,<sup>†,‡,\*</sup> Hongyu Liu,<sup>†,§</sup> Tiantian Dai,<sup>†,§</sup> Lingli Qi,<sup>†,§</sup>*

*Shimao Wang,<sup>†,‡</sup> Jingzhen Shao,<sup>†,‡</sup> Ruhua Tao,<sup>†,‡</sup> Xiaodong Fang,<sup>†,‡,\*</sup>*

<sup>†</sup>Anhui Provincial Key Laboratory of Photonic Devices and Materials, Anhui Institute of Optics  
and Fine Mechanics, Chinese Academy of Sciences, Hefei 230031, China.

<sup>‡</sup> Key Lab of Photovoltaic and Energy Conservation Materials, Chinese Academy of Sciences,  
Hefei 230031, China.

<sup>§</sup> University of Science and Technology of China, Hefei 230026, China

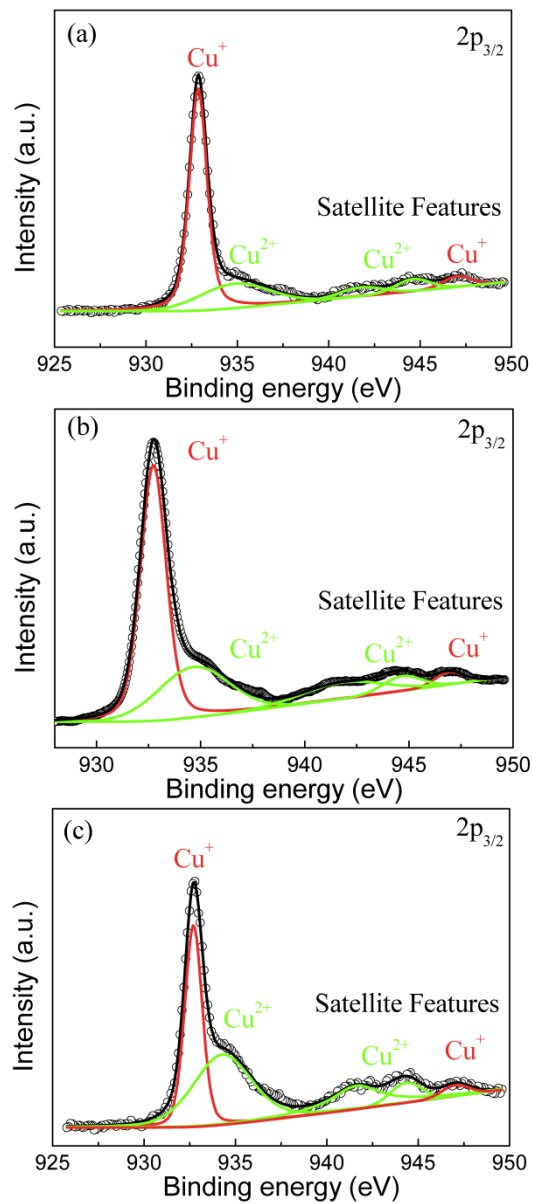

**Figure S1.** Cu 2p<sub>3/2</sub> XPS spectra of CuScO<sub>2</sub> annealed at various temperatures (a) for S-200, (b) for S-250 and (c) for S-350.

**Table S1.** Fitted peak positions of XPS spectra of CuScO<sub>2</sub> annealed at various temperatures.

| Samples | Cu <sup>+</sup>   |                   | Cu <sup>2+</sup>  |                   | Sc                |                   | O <sub>lattice</sub> | O <sub>ads.</sub> |
|---------|-------------------|-------------------|-------------------|-------------------|-------------------|-------------------|----------------------|-------------------|
|         | 2p <sub>3/2</sub> | 2p <sub>1/2</sub> | 2p <sub>3/2</sub> | 2p <sub>1/2</sub> | 2p <sub>3/2</sub> | 2p <sub>1/2</sub> |                      |                   |
| S-200   | 932.8             | 952.7             | 934.8             | 954.7             | 401.5             | 406.0             | 530.0                | 531.5             |
| S-250   | 932.7             | 952.6             | 934.7             | 954.3             | 401.5             | 406.0             | 530.0                | 531.5             |
| S-350   | 932.7             | 952.5             | 934.3             | 954.3             | 401.5             | 406.0             | 529.8                | 531.5             |

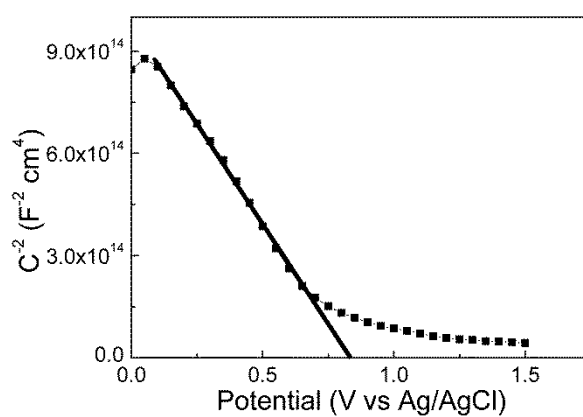

**Figure S2.** Mott-Schottky plot of CuScO<sub>2</sub>.
